# Supplementary material
Source: PubMed Central journal article supplement (PMC3017213)

**Supplementary Figure 1**

Wild type or KLF2<sup>-/-</sup> thymocytes were isolated and cultured as in Figure 3. (A) Shows expression of indicated cell surface markers on CD8 T cells at various times points during in vitro activation and cytokine culture, while (B) shows real-time PCR data for mRNA expression of the genes indicated, assayed on day 8 of the in vitro culture in IL-2 or IL-15.

# Supplementary Figure 1A

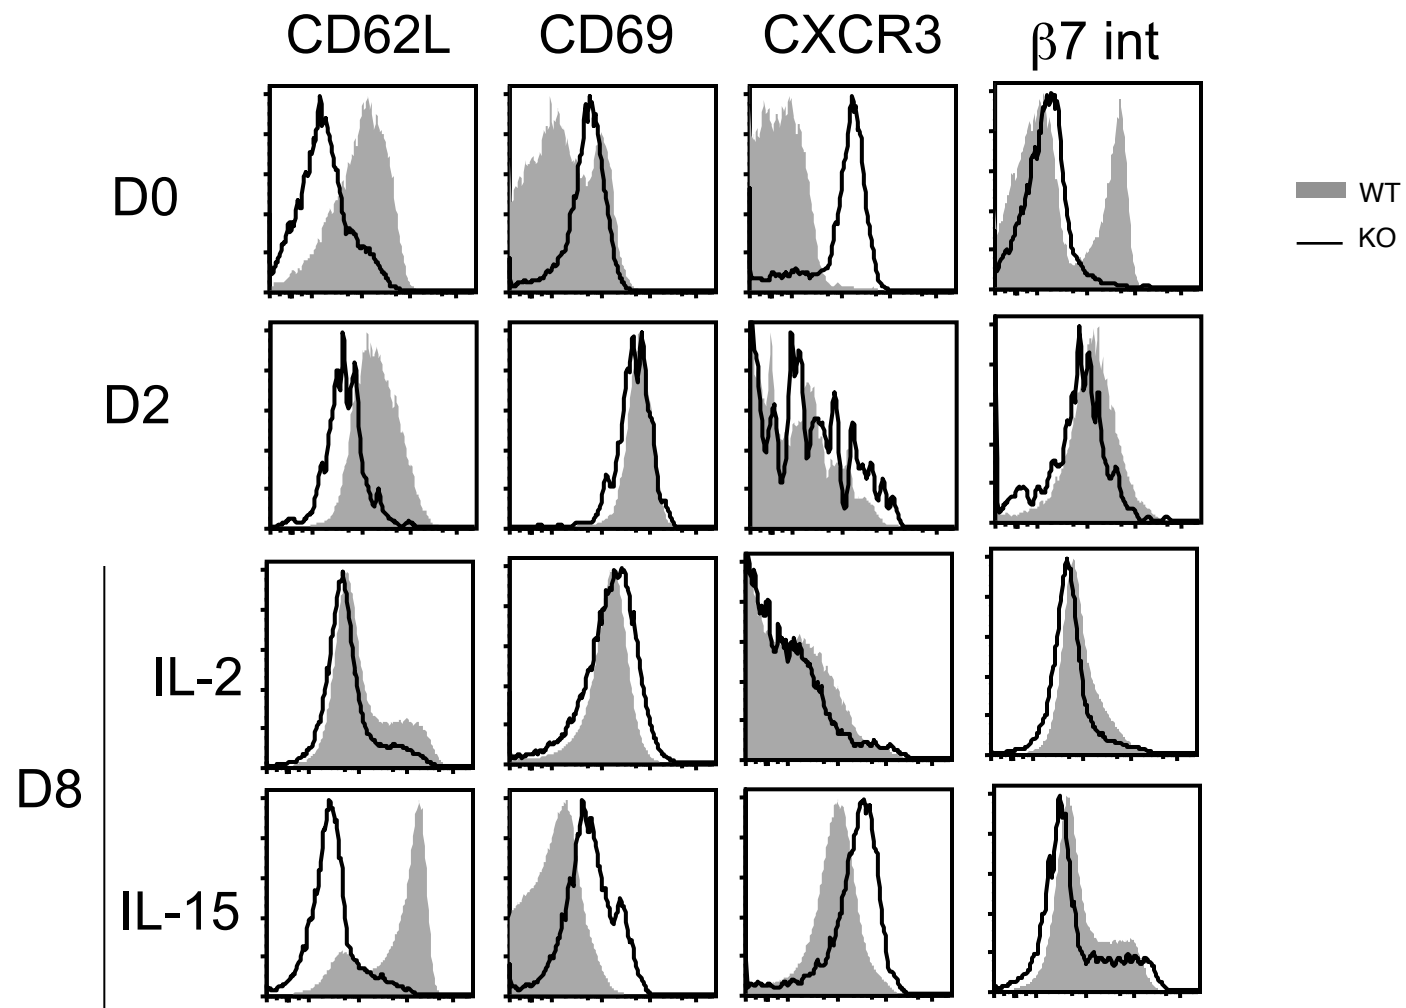

# Supplementary Figure 1B

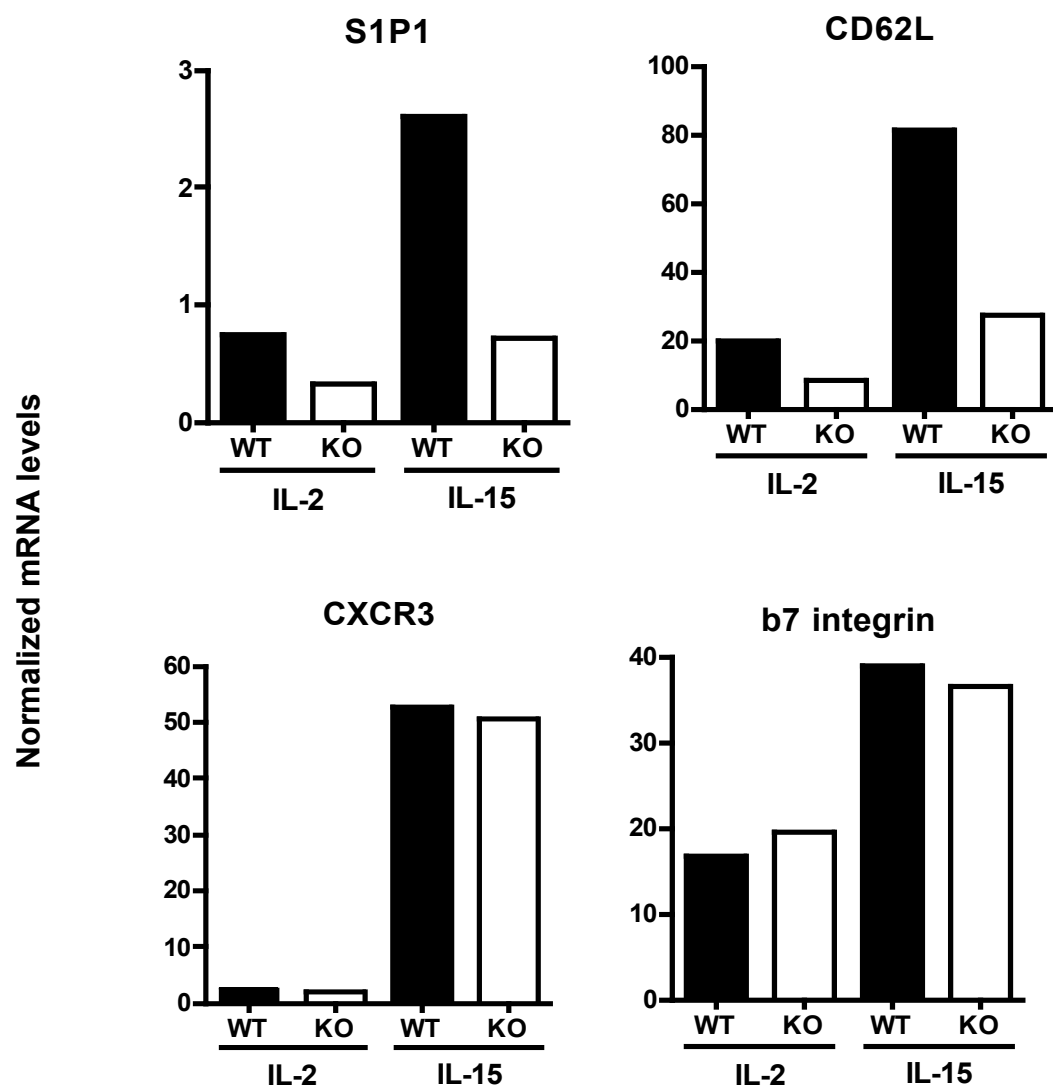

Supplement: NIHMS260580-supplement-Supplementary_Figs_.pdf [file NIHMS260580-supplement-Supplementary_Figs_.pdf]
